# Supplementary material for: Comparative analyses of super-enhancers reveal conserved elements in vertebrate genomes
Source: PubMed Central journal article supplement — Genome Res. 2017 Feb;27(2):259–68. doi: 10.1101/gr.203679.115 (PMC5287231; doi:10.1101/gr.203679.115), 2017-02
Supplement: supp_gr.203679.115_Supplemental_Fig_S1.pdf [file supp_gr.203679.115_Supplemental_Fig_S1.pdf]

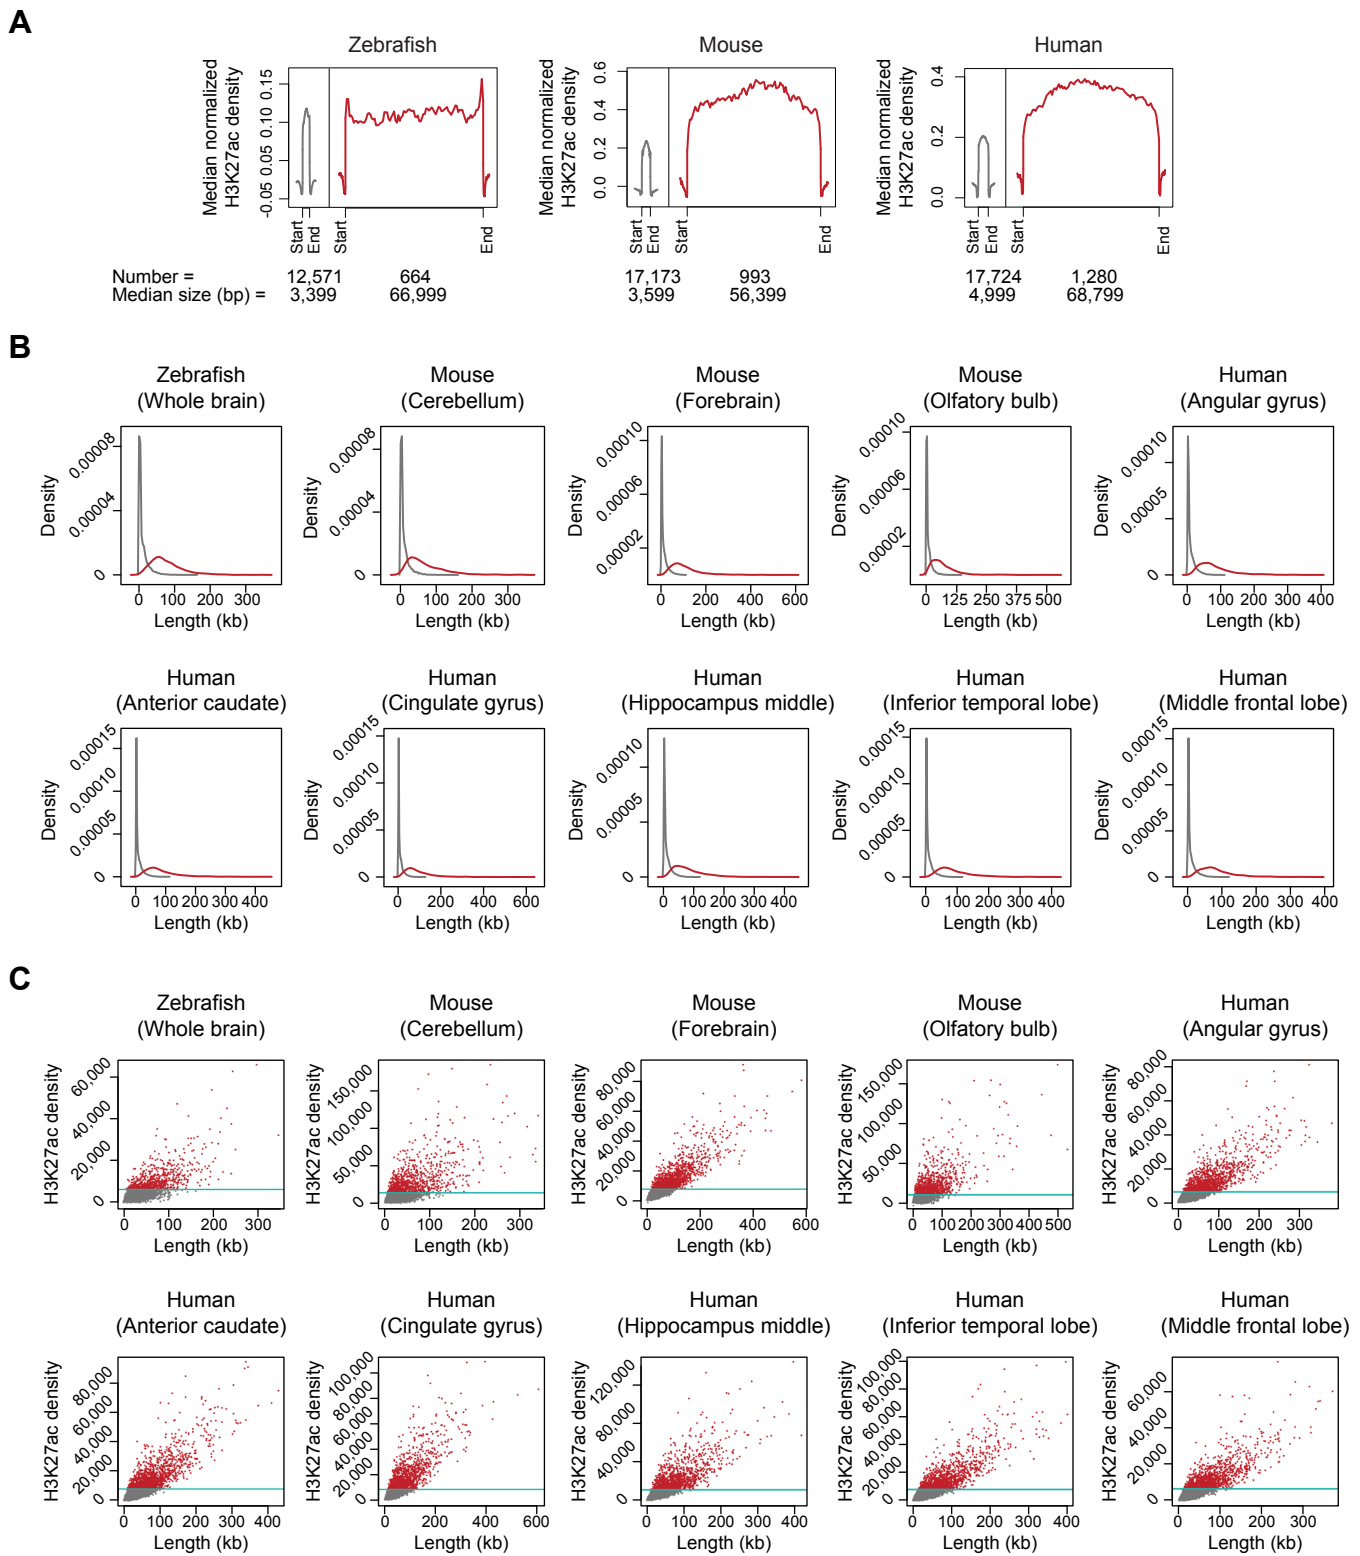

**Supplemental Figure S1.** H3K27ac density and length distribution of typical enhancers and SEs. (A) Metagenes of normalized H3K27ac densities of brain typical enhancers (grey curves) and SEs (red curves). The start and end of typical enhancers and SEs scaled relative to the median lengths and flanked by 3 kb of adjacent sequence are shown on the x-axis. The y-axis shows the median H3K27ac density across typical enhancers and SEs indicated in reads per million per kilobase (RPKM). The number and median size in base pairs of the typical enhancers and the SEs identified in each organism are noted below each plot. Mouse and human adult brain datasets represent olfactory bulb and hippocampus middle regions, respectively. (B) Density plots representing the length distributions in kilobases (x-axis) of brain typical enhancers (grey curves) and SEs (red curves). (C) Relationship between H3K27ac density (y-axis) and length in kilobases (x-axis) of brain typical enhancers and SEs. Grey dots represent typical enhancers and red dots represent SEs. The green line indicates the density cutoff used to classify typical enhancers and SEs.
