# Supplementary material for: Comparative analyses of super-enhancers reveal conserved elements in vertebrate genomes
Source: PubMed Central journal article supplement — Genome Res. 2017 Feb;27(2):259–68. doi: 10.1101/gr.203679.115 (PMC5287231; doi:10.1101/gr.203679.115), 2017-02
Supplement: supp_gr.203679.115_Supplemental_Fig_S3.pdf [file supp_gr.203679.115_Supplemental_Fig_S3.pdf]

**A**

Pluripotent state

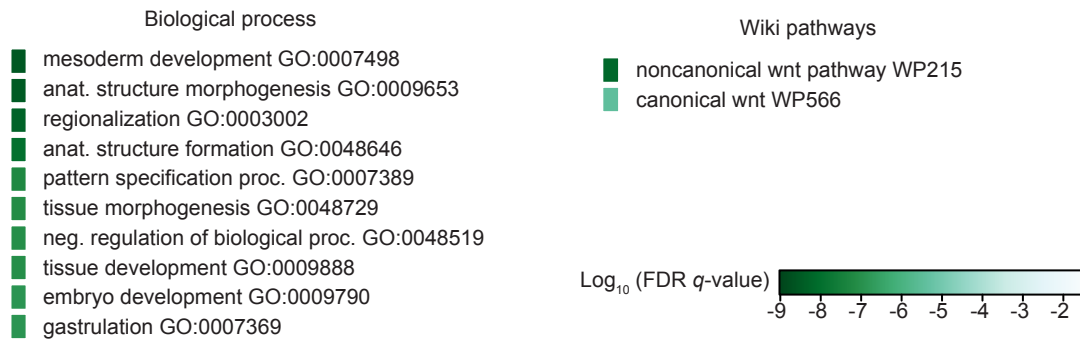

**B**

Brain

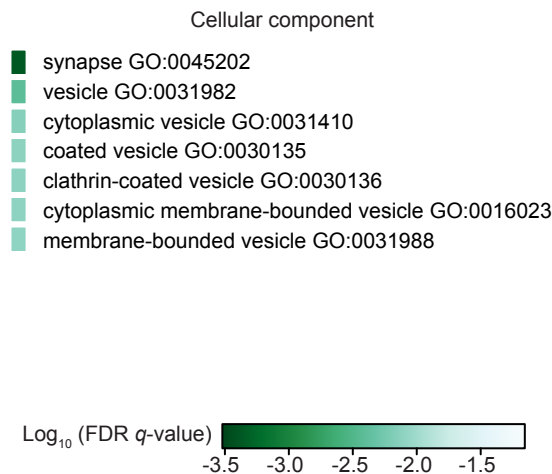

**C**

Intestine

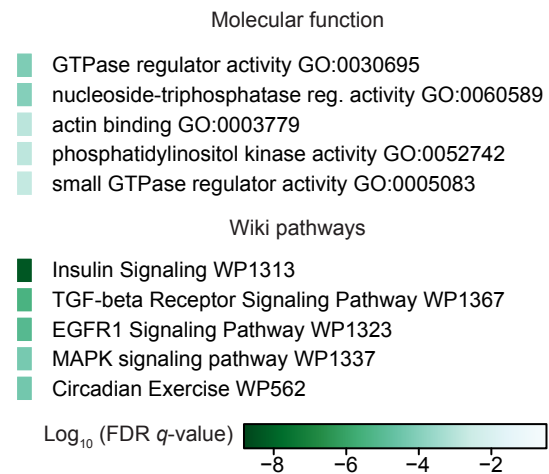

**D**

Heart

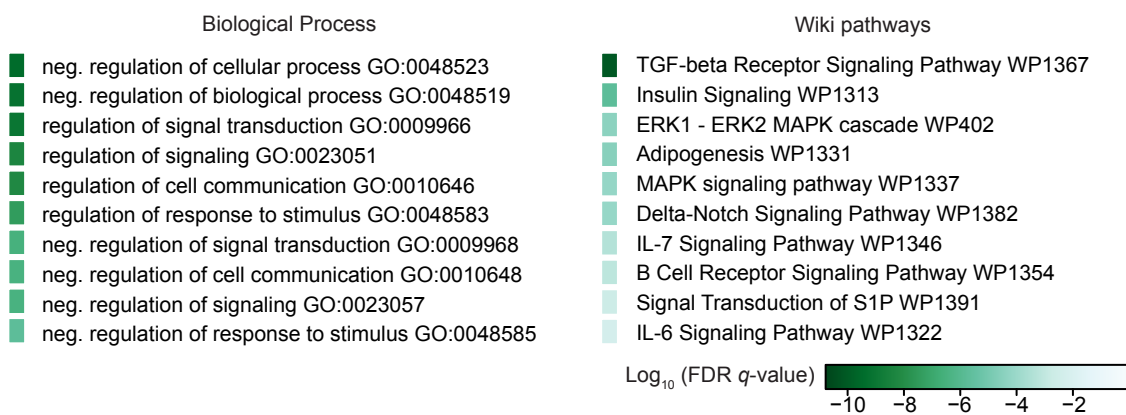

**E**

Testis

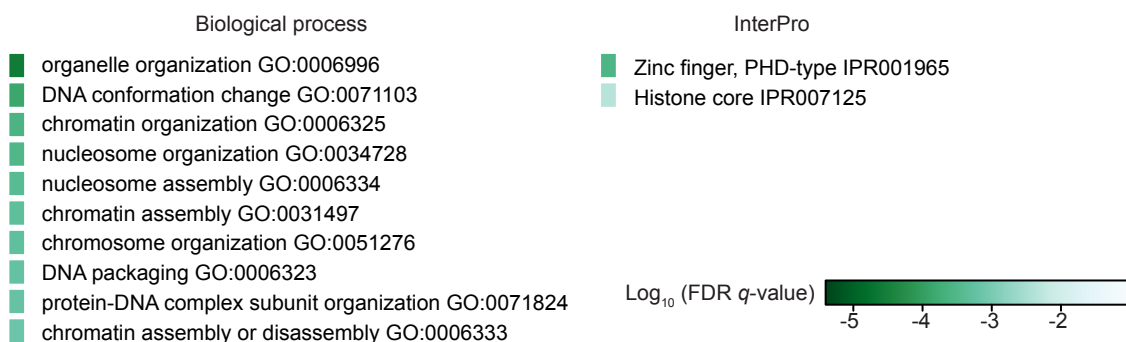

**Supplemental Figure S3.** Gene ontology (GO) annotations of zebrafish SEs. (A) Top biological process and wiki pathway GO terms enriched for pluripotent state SEs. Binomial FDR *q*-values for the GO terms are displayed on a color-scale. Only terms with *q*-values < 0.015 were considered as significantly enriched. (B) Top cellular component GO terms enriched for brain SEs. *Q*-values are as described in (A). (C) Top molecular function and wiki pathway GO terms enriched for intestine SEs. *Q*-values are as described in (A). (D) Top biological process and wiki pathway GO terms enriched for heart SEs. *Q*-values are as described in (A). (E) Top biological process and InterPro GO terms enriched for testis SEs. *Q*-values are as described in (A).
