# Supplementary material for: Comparative analyses of super-enhancers reveal conserved elements in vertebrate genomes
Source: PubMed Central journal article supplement — Genome Res. 2017 Feb;27(2):259–68. doi: 10.1101/gr.203679.115 (PMC5287231; doi:10.1101/gr.203679.115), 2017-02
Supplement: supp_gr.203679.115_Supplemental_Fig_S7.pdf [file supp_gr.203679.115_Supplemental_Fig_S7.pdf]

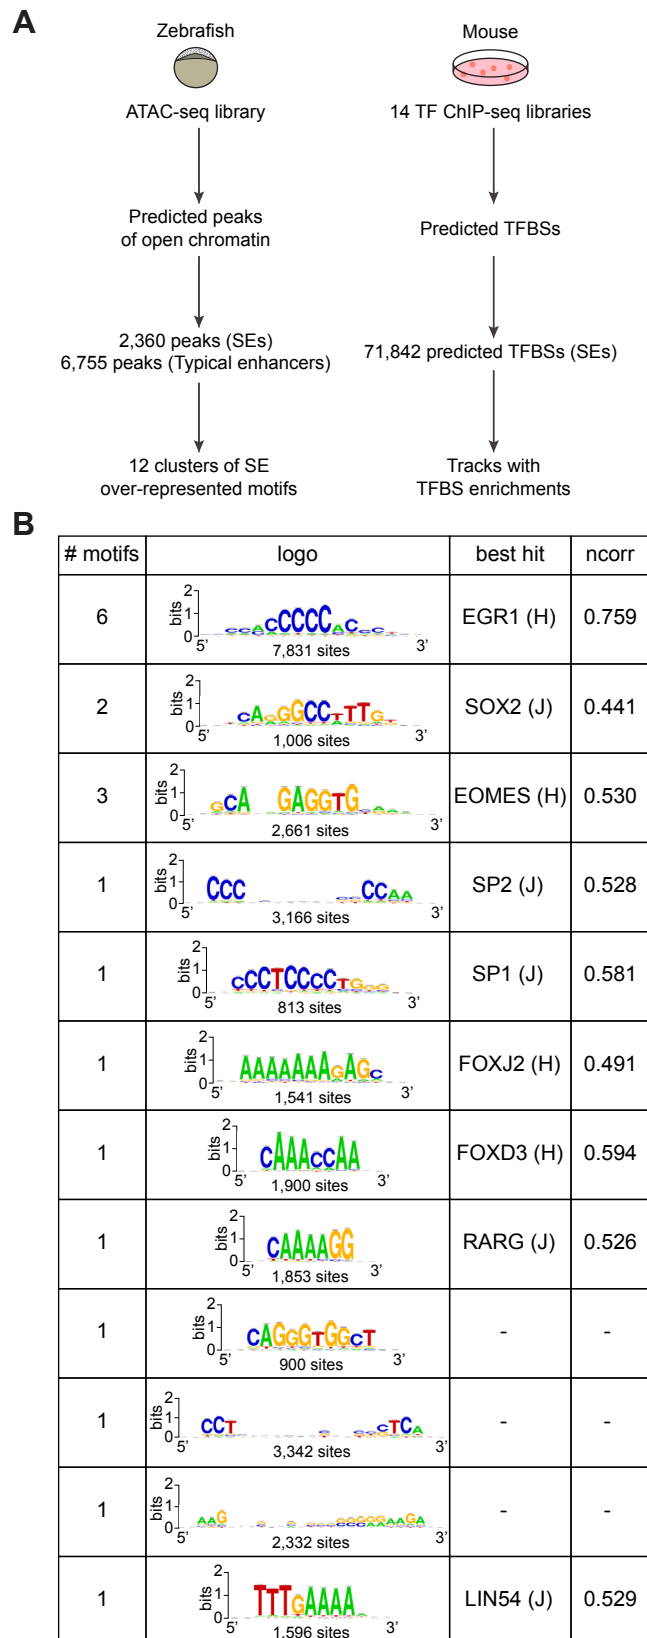

**Supplemental Figure S7.** SE composition in zebrafish and mouse pluripotent state. (A) Pipeline for the identification of over-represented motifs in zebrafish SEs and TFBS-enriched regions in mouse. (B) Identified clusters of over-represented motifs within zebrafish pluripotent state SEs. Logos represent the consensus motif for each cluster, y-axis depicts the information content in bits for each position (x-axis). TF names corresponding to the matrix models with highest similarity to the consensus motif (best hit) are shown. J, JASPAR model; H, human HOCOMOCO model; ncorr, normalized correlation.
