# Supplementary material for: Comparative analyses of super-enhancers reveal conserved elements in vertebrate genomes
Source: PubMed Central journal article supplement — Genome Res. 2017 Feb;27(2):259–68. doi: 10.1101/gr.203679.115 (PMC5287231; doi:10.1101/gr.203679.115), 2017-02
Supplement: supp_gr.203679.115_Supplemental_Fig_S8.pdf [file supp_gr.203679.115_Supplemental_Fig_S8.pdf]

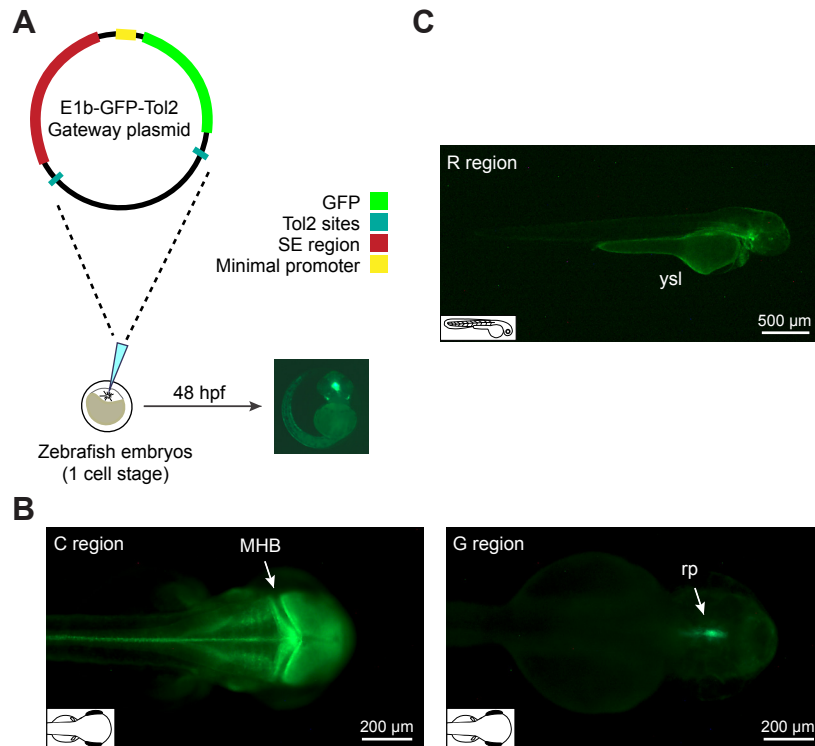

**Supplemental Figure S8.** Enhancer reporter assay. (A) Functional enhancer injection assay in zebrafish one-cell stage embryos showing the position of the cloned SE regions relative to the minimal promoter and GFP transgene. (B) F1 zebrafish embryos (48 hpf) showing specific GFP expression driven by the zebrafish region C and the mouse region G defined in Figure 6A. MHB, midbrain-hindbrain boundary; rp, roof plate. (C) F1 zebrafish embryos (48 hpf) showing specific GFP expression driven by the zebrafish region R defined in Figure 6C. Ysl, yolk syncytial layer.
